# Supplementary material for: Genome-wide data (ChIP-seq) enabled identification of cell wall-related and aquaporin genes as targets of tomato ASR1, a drought stress-responsive transcription factor
Source: PubMed Central journal article supplement (PMC3923394; doi:10.1186/1471-2229-14-29), 2014-01-14
Supplement: 1471-2229-14-29-S1.pdf [file 1471-2229-14-29-S1.pdf]

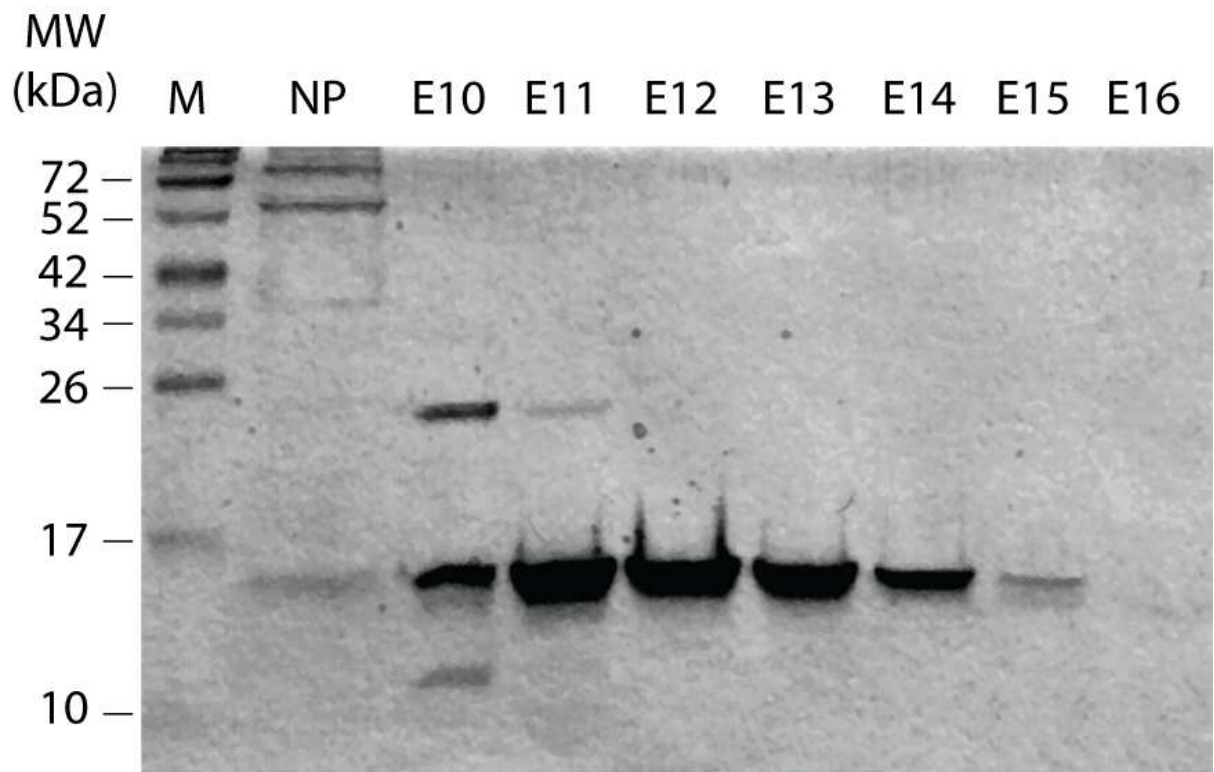

**Suppl. Fig. 1. Purification of ASR1 by a Ni<sup>2+</sup> affinity column chromatography.** SDS-PAGE of fractions eluted off the column through a non-linear continuous gradient of imidazol. ASR1 appeared pure in fractions E12-E15, with no detectable contaminant proteins. MW: Molecular weight markers. NP: non-purified starting material from recombinant *E. coli* cultures.

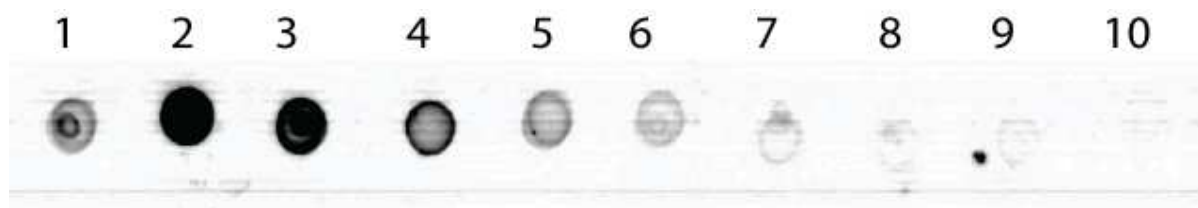

**Suppl. Fig. 2. Purification of the anti-ASR1 antibody.** Total immunoglobulins from ASR1-immunized rabbits were precipitated with ammonium sulphate, dialyzed and passed through a Hi-Trap Protein G column. Eluted immunoglobulin fractions showing high O.D. measurements at 280 were then pooled and passed through a prepared Sepharose-ASR1 column. 1 ul of the successive eluted fractions was spotted on a nitrocellulose strip. After drying, Ponceau Red staining was performed to visualize the fractions that revealed a high yield of protein (dot blots 2-4 on the figure representing fractions 2-4).

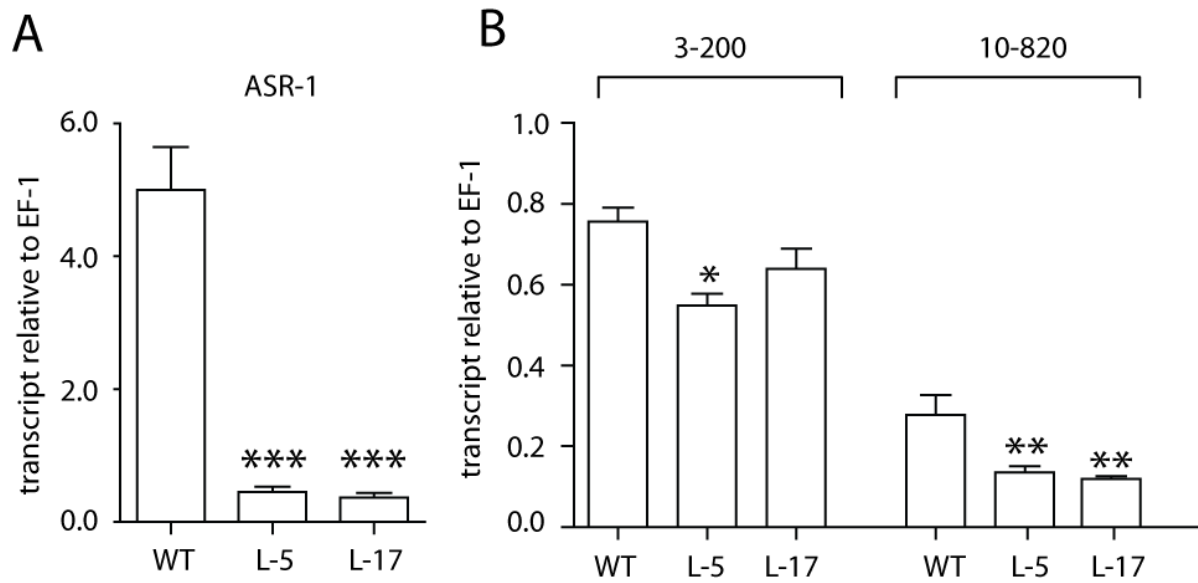

**Suppl. Fig 3. Testing another housekeeping gene for normalization of transcript levels.** Expression levels of *Asr1* (A), *Solyc03g115200.1* (Glucan endo-1 3-beta-glucosidase) and *Solyc10g054820.1* (aquaporin) (B) genes, relativized against the house-keeping gene EF-1 in WT and *Asr1*-silenced (L-5 and L-17 lines) plants. \* $p < 0.05$ , \*\* $p < 0.01$ , \*\*\* $p < 0.0001$ .

| <b>Amplicon</b>              | <b>Primers</b> | <b>Sequence</b>        | <b>PCR Efficiency</b> |
|------------------------------|----------------|------------------------|-----------------------|
| Solyc09g010950.2<br>(9-950)  | Fw             | TAACCCTTGTGAGCCCATTC   | 91.10%                |
|                              | Rev            | AGTTGATGAAAGCCCAGCAC   |                       |
| Solyc10g054800.1<br>(10-800) | Fw             | TTGCCCTATGGCAGAAAGAG   | 89.50%                |
|                              | Rev            | TAGCCCGGACTCAATAATGG   |                       |
| Solyc10g054810.1<br>(10-810) | Fw             | GCCTCTTTTAGCGGTGATTG   | 97.50%                |
|                              | Rev            | TTGGCCTTGTCACGTCTTG    |                       |
| Solyc10g054820.1<br>(10-820) | Fw             | AAGGAAACCCCATACATCACC  | 99.30%                |
|                              | Rev            | GGGTTGTTAAGGCTTTGTCTG  |                       |
| Solyc03g097830.2<br>(3-830)  | Fw             | TGGACCGATGACATCTTAGC   | 98.80%                |
|                              | Rev            | AAGACTCTGGACTCGGGTTG   |                       |
| Solyc05g008080.1<br>(5-080)  | Fw             | TCCTCGAACATGACTCGAAC   | 90.50%                |
|                              | Rev            | TGGCCCAATACTTCTTGCTG   |                       |
| Solyc05g056130.2<br>(5-130)  | Fw             | AACAAGCTTTGGGCTTTGG    | 93.00%                |
|                              | Rev            | TGTTGGCCAGTCTATTGAG    |                       |
| Solyc07g062660.2<br>(7-660)  | Fw             | CCCAAAGCAACAGTTGTCAC   | 94.00%                |
|                              | Rev            | GGGCTTCTAGGCCTGTATTTTC |                       |
| ST-3                         | Fw             | GGATGAGCATCATATGCGTAG  | 98.80%                |
|                              | Rev            | TTTCACACGTCTCTGCCAAG   |                       |

**Suppl. Table 1.** Primers used for ChIP validation.

| <b>Gene</b>                  | <b>Primers</b> | <b>Sequence</b>        | <b>PCR efficiency</b> |
|------------------------------|----------------|------------------------|-----------------------|
| Asr1                         | Fw             | CAGATGGAGGAGGAGAAACAC  | 90.20 %               |
|                              | Rev            | TAGAAGAGATGGTGGTGTCCC  |                       |
| Solyc03g115200.2<br>(3-200)  | Fw             | CTTCATACAAACGGGCCTTG   | 97.00 %               |
|                              | Rev            | GTTGGTTGTGGTTGTGGATG   |                       |
| Solyc10g054820.1<br>(10-820) | Fw             | AAGGAAACCCCATACATCACC  | 96.40 %               |
|                              | Rev            | GGGTTGTTAAGGCTTTGTCTG  |                       |
| Ubi3                         | Fw             | GCCGACTACAACATCCAGAAGG | 97.70 %               |
|                              | Rev            | TGCAACACAGCGAGCTTAACC  |                       |
| EF-1                         | Fw             | GATTGGTGGTATTGGAAGTCTC | 99.70 %               |
|                              | Rev            | AGCTTCGTGGTGCATCTC     |                       |

**Suppl. Table 2.** Primers used for expression analysis (qRT-PCR).

**Macs Parameters**

This file is generated by MACS version 1.4.2 20120305

**ARGUMENTS LIST:**

name = m\_chip

format = AUTO

ChIP-seq file = chip\_a8.bam

control file = input.bam

effective genome size = 7.00e+08

band width = 200

model fold = 10,30

p-value cutoff = 1.00e-05

Large dataset will be scaled towards smaller dataset.

Range for calculating regional lambda is: 1000 bps and 10000 bps

tag size is determined as 51 bps

total tags in treatment: 6977570

tags after filtering in treatment: 6977570

maximum duplicate tags at the same position in treatment = 1

Redundant rate in treatment: 0.00

total tags in control: 2071128

tags after filtering in control: 2071128

maximum duplicate tags at the same position in control = 1

Redundant rate in control: 0.00

d = 54

**Gimmemotif parameters**

Lwidth: 500

Background: genomic\_matched, random

Tools: MDmodule, MEME, MotifSampler, trawler, Improbizer, BioProspector, Weeder

weird\_option: False

use\_strand: False

abs\_max: 1000

analysis: large

enrichment: 1.5

width: 200

keep\_intermediate: False

genome: Slyco

fraction: 0.2

cluster\_threshold: 0.95

max\_time: None

available\_tools: MDmodule, MEME, GADeM, MotifSampler, trawler, Improbizer, BioProspector, Weeder

user\_background: None

p-value: 0.05

markov\_model:

**Suppl. List 1.** Software parameters used in this work.
